# Supplementary material
Source: publisher figshare collection journal article supplement (https://rs.figshare.com/ndownloader/files/22625801)

**Supplementary materials for “Behavioural variation and learning across the lifespan in wild white-faced capuchin monkeys.”  
(Susan Perry)**

Materials are arranged according to the section of the article where they are mentioned in the main text.

**Section 2: How do personality traits/attitudes relevant to learning change with age?**

SI Table 1: Model predictions (estimate of fixed effects, with standard errors) for linear mixed effects models in which age predicts values of personality ratings. \*\*\* PrChi <0.001. df=1 in all models.

|                                                       | creative               | active                 | alert                  | attentive             | curious               | opportunistic          | neophobic              | playful               |
|-------------------------------------------------------|------------------------|------------------------|------------------------|-----------------------|-----------------------|------------------------|------------------------|-----------------------|
| <b>fixed effects (estimate, SE)</b>                   |                        |                        |                        |                       |                       |                        |                        |                       |
| intercept                                             | 3.326 ±<br>0.032       | 3.533 ±<br>0.037       | 2.646 ±<br>0.029       | 3.028 ±<br>0.030      | 3.681 ±<br>0.035      | 3.178 ±<br>0.030       | 2.502 ±<br>0.031       | 3.836 ±<br>0.036      |
| age                                                   | -0.037 ±<br>0.003      | -0.052 ±<br>0.004      | 0.059 ±<br>0.004       | 0.0004 ±<br>0.0041    | -0.080 ±<br>0.003     | -0.015 ±<br>0.003      | 0.059 ±<br>0.003       | -0.097 ±<br>0.004     |
| LRT and<br>significance<br>level, fixed<br>effect age | 95 ***                 | 107 ***                | 167 ***                | 0.0067<br>P= 0.9      | 306 ***               | 24 ***                 | 249 ***                | 312 ***               |
| <b>Random Effects: SD [correlation]</b>               |                        |                        |                        |                       |                       |                        |                        |                       |
| Monkey<br>(intercept)                                 | 0.439                  | 0.507                  | 0.274                  | 0.368                 | 0.517                 | 0.312                  | 0.423                  | 0.533                 |
| monkey-age<br>slope                                   | 0.036<br>[corr. -0.74] | 0.040<br>[corr. -0.64] | 0.052<br>[corr. -0.83] | 0.044<br>[corr.-0.61] | 0.042<br>[corr.-0.82] | 0.021<br>[corr. -0.41] | 0.033<br>[corr. -0.81] | 0.041<br>[corr.-0.69] |
| rater<br>intercept                                    | 6.48E-05               | 0.128                  | 0.104                  | 3.90E-05              | 0.072                 | 0.00013                | 0.0007375              | 0.104                 |
| # ratings                                             | 7928                   | 7996                   | 7996                   | 7918                  | 7995                  | 7920                   | 7843                   | 7996                  |
| # monkeys                                             | 439                    | 439                    | 439                    | 439                   | 439                   | 439                    | 439                    | 439                   |
| # raters                                              | 83                     | 84                     | 84                     | 83                    | 84                    | 83                     | 82                     | 84                    |

SI Table 2: Model predictions (estimate of fixed effects, with standard errors) for 8 quadratic mixed effects models in which age predicts values of personality ratings. \*\* PrChi<0.01, \*\*\* PrChi <0.001. df=1 in all models.

|                                                      | creative        | active           | alert            | attentive        | curious         | opportunistic   | neophobic        | playful         |
|------------------------------------------------------|-----------------|------------------|------------------|------------------|-----------------|-----------------|------------------|-----------------|
| <b>fixed effects (estimate, SE)</b>                  |                 |                  |                  |                  |                 |                 |                  |                 |
| intercept                                            | 3.357 ± 0.038   | 3.474 ± 0.043    | 2.450 ± 0.032    | 2.976 ± 0.036    | 3.829 ± 0.039   | 3.184 ± 0.034   | 2.358 ± 0.035    | 3.977 ± 0.039   |
| age                                                  | 0.046 ± 0.007   | -0.035 ± 0.007   | 0.122 ± 0.007    | 0.017 ± 0.008    | -0.123 ± 0.006  | -0.017 ± 0.007  | 0.100 ± 0.006    | -0.140 ± 0.006  |
| l(age^2)                                             | 0.0005 ± 0.0003 | -0.0009 ± 0.0003 | -0.0036 ± 0.0003 | -0.0009 ± 0.0003 | 0.0022 ± 0.0003 | 0.0001 ± 0.0003 | -0.0020 ± 0.0002 | 0.0022 ± 0.0002 |
| LRT and significance level,<br>fixed effect age      | 38 ***          | 20 ***           | 286 ***          | 5, P=0.026       | 266 ***         | 7 **            | 218 ***          | 307 ***         |
| LRT and significance level,<br>fixed effect l(age^2) | 2 P= 0.14       | 7 **             | 128 ***          | 7 P=0.01         | 54 ***          | 0.12 P= 0.7     | 59 ***           | 51 ***          |
| <b>Random Effects: SD [correlation]</b>              |                 |                  |                  |                  |                 |                 |                  |                 |
| Monkey (intercept)                                   | 0.435           | 0.513            | 0.196            | 0.368            | 0.474           | 0.312           | 0.384            | 0.494           |
| monkey-age slope                                     | 0.035 [-0.74]   | 0.043 [-0.65]    | 0.040 [-0.69]    | 0.044 [-0.61]    | 0.032 [-0.82]   | 0.021 [-0.41]   | 0.022 [-0.82]    | 0.026 [-0.72]   |
| rater intercept                                      | 0.00000         | 0.126            | 0.093            | 0.00000          | 0.079           | 0.00013         | 0.000046         | 0.111           |
| # ratings                                            | 7928            | 7996             | 7996             | 7918             | 7995            | 7920            | 7843             | 7996            |
| # monkeys                                            | 439             | 439              | 439              | 439              | 439             | 439             | 439              | 439             |
| # raters                                             | 83              | 84               | 84               | 83               | 84              | 83              | 82               | 84              |

The raw data sets for these analyses are found in separate tabs of the file called “2\_PersonalityRawData.xlsx”.

The R code used to run these models and create these graphics are found in the file called “2\_Personality\_Rcode.R”

#### Additional methodological notes about the models in section 2:

Several convergence warnings were generated when running these models in R version 3.6.1, using the lme4 package. Following the advice on <https://rdrr.io/cran/lme4/man/convergence.html>, the models were rerun using “allFit” with all available optimizers. Because all 5 optimizers (except, sometimes, nlminbwrap) converged to approximately equivalent values, the warnings were assumed to be false positives.

The three models with warnings about being singular had very low variance for the random effect “respondent” in the model version we used (attentive:  $4e-5$ , creative:  $6.5e-5$ , and neophobic:  $7.3e-4$ ). Comparison of the full model with a model eliminating respondent as a random effect revealed virtually identical results.

SI Figure 1: Age-related changes in personality traits for quadratic mixed effect models including monkey identity, respondent identity, and monkey-age slope as random effects. X-axis is age in years, from 0 to 39 years of age. Y-axis is rating of that personality trait, from 0 to 5. Values are predicted estimates based on the quadratic model, and shaded areas represent 95% confidence intervals.

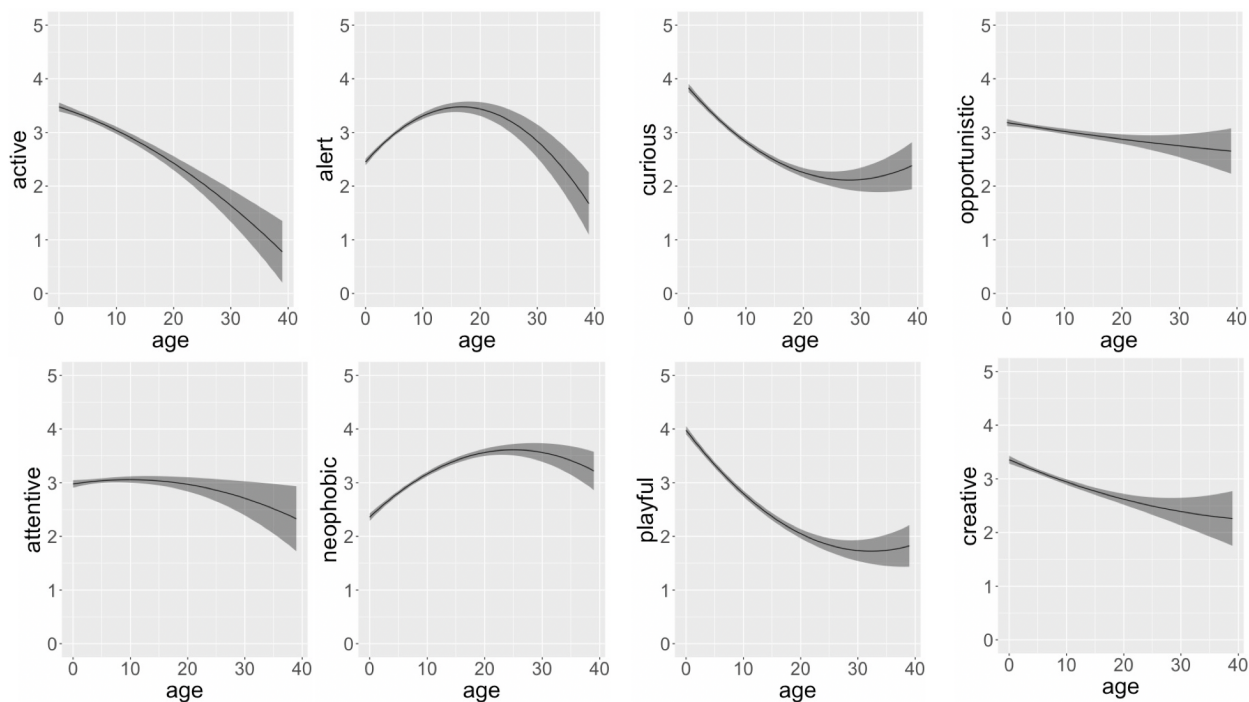

### Section 3: How do capuchins change with age regarding their motivation to seek information about foraging from conspecifics?

SI Figure 2: Three juvenile capuchins peer at an adult male who is foraging on rare insects, while a fourth juvenile watches from a greater distance. They are emitting “scary food peep” vocalizations - a call normally produced when handling (or watching someone else handle) potential prey that can be hazardous in some way (e.g. wasps having particularly dangerous stings, maggots gleaned from others’ wounds or found in faeces, or dead prey).

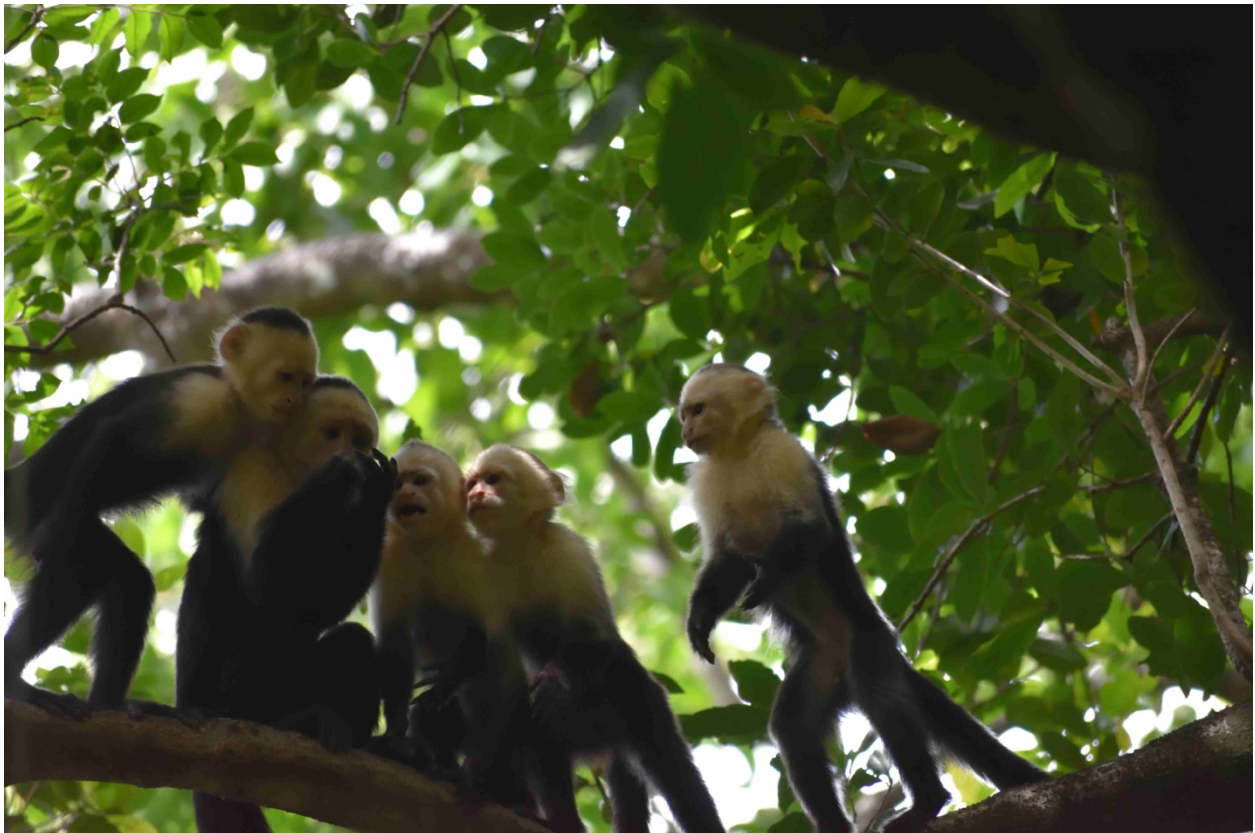

The raw data, along with the code used to create the model described in the main text, are found in separate tabs of the file called “3\_PeeringData\_code.xlsx”

#### Section 4: What is the role of age in individuals' choices about whose foraging to observe?

SI Figure 3: Y axis shows age of the forager, X-axis shows age of the focal. Blue line (diamonds) shows mean age of foragers whom the focal ignored; red line (squares) shows mean age of foragers the focal watched. This is a plot of raw data, not model predictions.

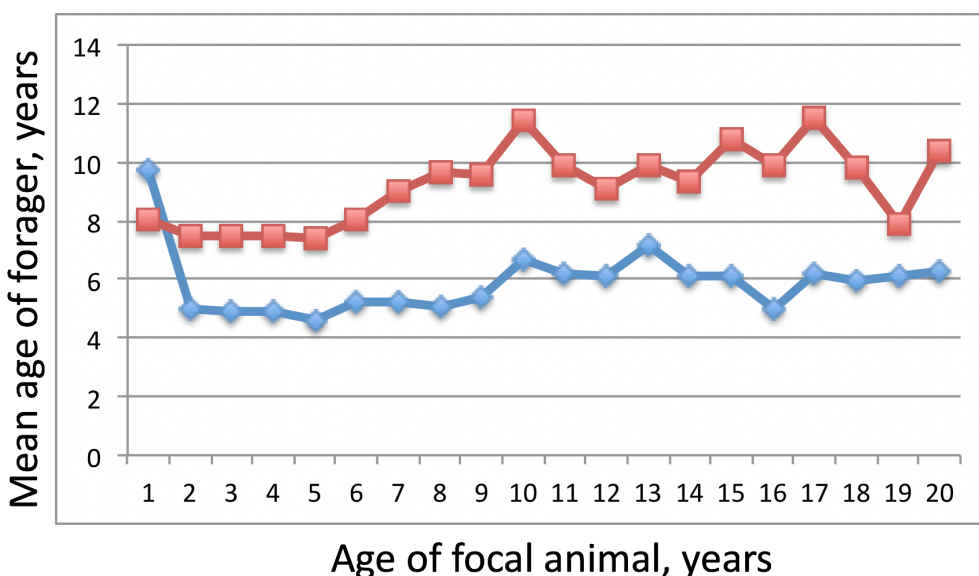

SI Table 3: Mixed-effects logistic regression model output demonstrating effects of focal monkey's age and foraging monkeys' age on probability that the focal animal will watch the forager's actions.\*

|                        | Odds ratio | SE    | P      | 95% CI         |
|------------------------|------------|-------|--------|----------------|
| <b>Fixed effects:</b>  |            |       |        |                |
| Focal age              | 0.966      | 0.004 | <0.001 | 0.958 to .974  |
| Forager age            | 1.091      | 0.005 | <0.001 | 1.082 to 1.101 |
| constant               | 0.238      | 0.016 | <0.001 | 0.208 to 0.272 |
| <b>Random effects:</b> |            |       |        |                |
| Focal identity         | 0.158      | 0.027 |        | 0.112 to 0.222 |
| Forager identity       | 0.371      | 0.041 |        | 0.298 to 0.461 |

\*A model run exclusively on focal monkeys under age 21 (sample size of 71144 observations) yielded similar results (Odds ratio of 0.963 for focal age, and 1.094 for forager age, both  $P < 0.001$ ), so the results seem not to have been biased by low sampling in the older age ranges.

SI Figure 4: Model predictions regarding impact of forager age on the odds of the forager being watched by the focal animal, for 4 different focal animal ages corresponding to infancy (age 1), juvenile (age 3), young adult (age 10), and middle-aged adult (age 20).

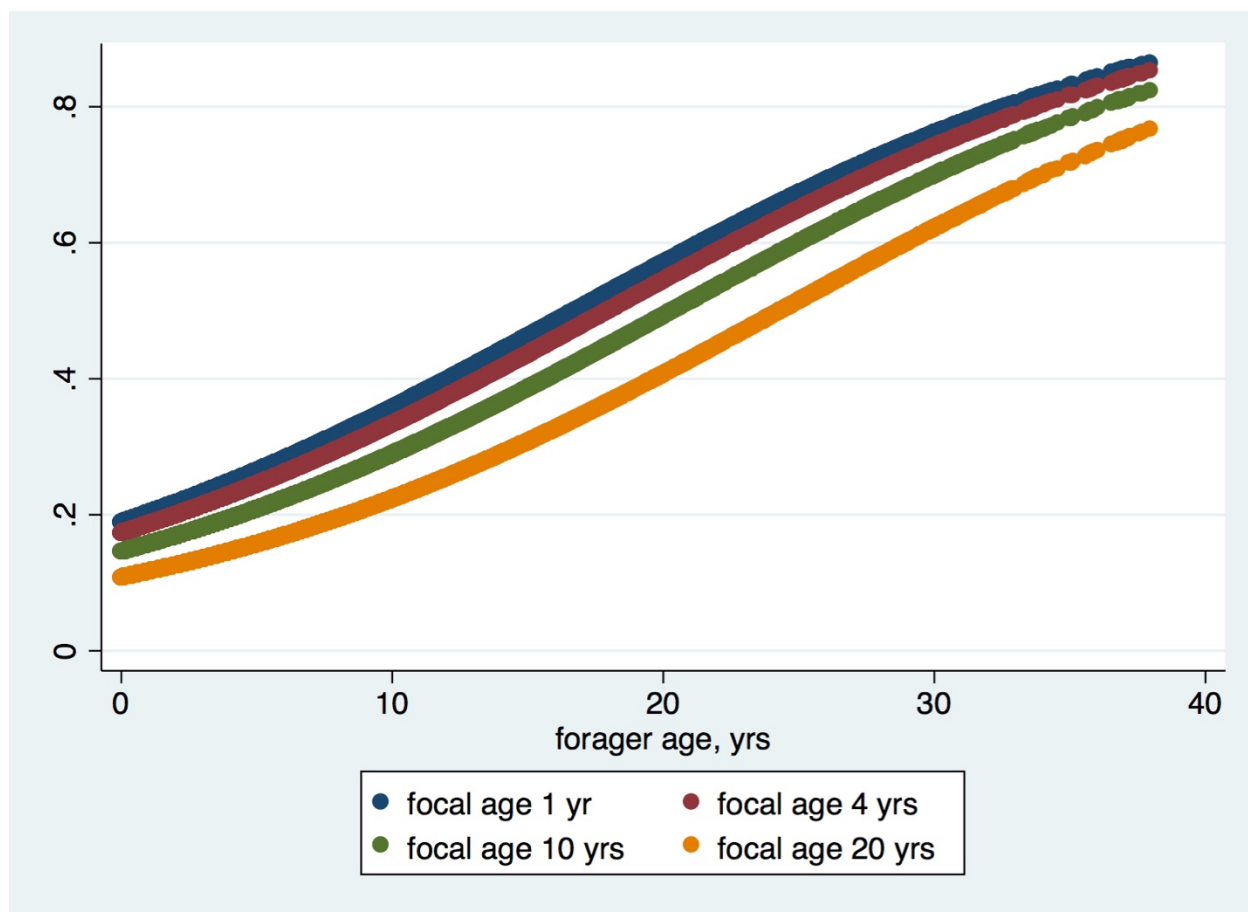

The raw data, along with the code used to create the model described in the main text and presented in SI Table 2 and SI Figure 4, are found in separate tabs of the file called "4\_Dataset\_Code\_focal-forager\_ages\_watching.xlsx".

## Section 6: Age-related changes in behavioural repertoires:

The raw data, along with the coding scheme and the code used to create the model described in the main text and described in SI Table 3, are found in separate tabs of the file called “6\_Luehea\_diversity\_dataset\_coding.xlsx”

SI Table 4: Model predictions for 4 Poisson models with cluster-robust standard error, in which age predicts # of techniques used to process *Luehea* fruits, using a different coding scheme for behavioral diversity. N=68 observations, SE adjusted for 37 clusters (in monkey).

| Model                               |          | Coef.  | SE    | P> z   | 95% CI           |
|-------------------------------------|----------|--------|-------|--------|------------------|
| <b>Model 1: liberal coding</b>      |          |        |       |        |                  |
|                                     | age      | -0.090 | 0.020 | <0.001 | -0.130 to -0.051 |
|                                     | constant | 1.397  | 0.131 | <0.001 | 1.140 to 1.654   |
| <b>Model 2: conservative coding</b> |          |        |       |        |                  |
|                                     | age      | -0.068 | 0.017 | <0.001 | -0.102 to -0.034 |
|                                     | constant | 1.038  | 0.115 | <0.001 | 0.812 to 1.264   |
| <b>Model 3: sensible techniques</b> |          |        |       |        |                  |
|                                     | age      | -0.035 | 0.009 | <0.001 | -0.053 to -0.016 |
|                                     | constant | 0.684  | 0.091 | <0.001 | 0.506 to 0.862   |
| <b>Model 4: silly techniques</b>    |          |        |       |        |                  |
|                                     | age      | -0.408 | 0.161 | 0.01   | -0.723 to -0.094 |
|                                     | constant | 1.018  | 0.504 | 0.04   | 0.030 to 2.006   |

SI Figure 5: Age-related changes in diversity of techniques used to process *Luehea* fruits. This is a raw data plot using the more conservative coding scheme.

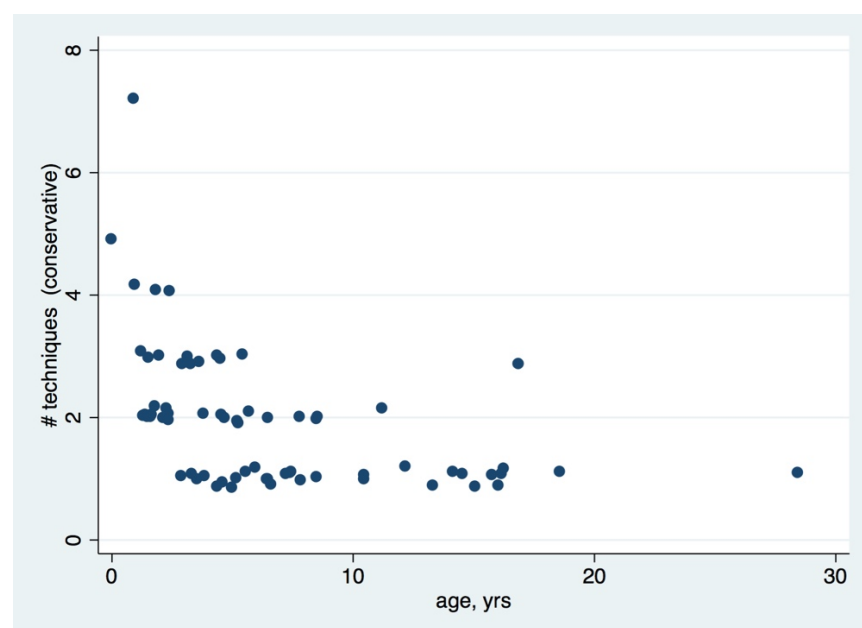

SI Figure 6: Age-related changes in diversity of techniques used to process *Luehea* fruits. This is a raw data plot of those behaviours coded as “sensible” (i.e. producing a high yield of seeds).

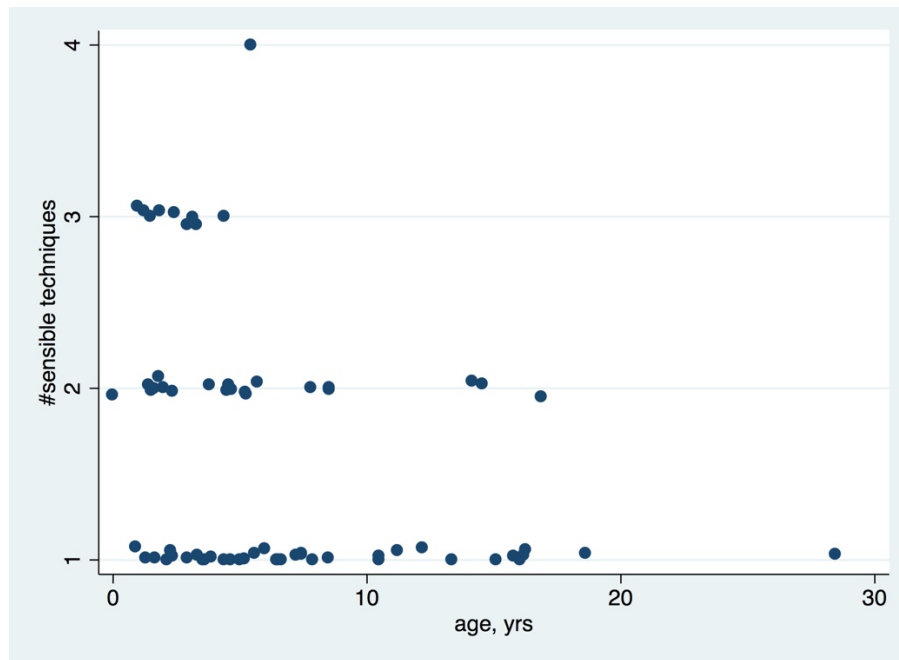

SI Figure 7: Age-related changes in diversity of techniques used to process *Luehea* fruits. This is a raw data plot of those behaviours coded as “silly” (i.e. producing a low yield of seeds and often involving extraneous movements).

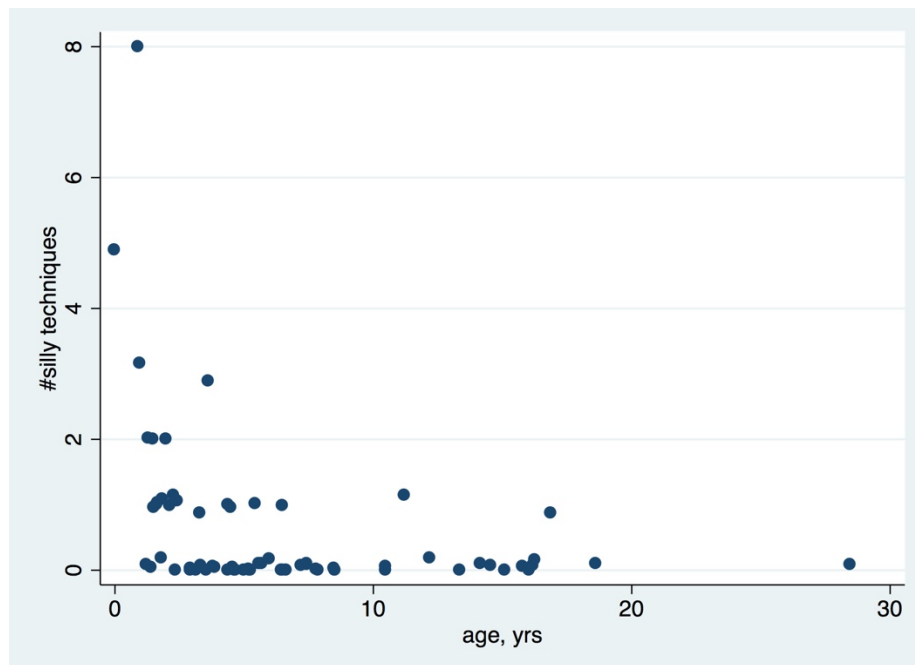

Supplement: Supplementary file 1 [file 22625801]
